# Supplementary material for: Nanostructured Bi2S3/WO3 heterojunction films exhibiting enhanced photoelectrochemical performance
Source: Royal Society of Chemistry journal article supplement (doi:10.1039/c3ta13239k), 2013-01-01
Supplement: c3ta13239k.pdf [file c3ta13239k.pdf]

# Nanostructured Bi<sub>2</sub>S<sub>3</sub>/WO<sub>3</sub> Heterojunction Films Exhibiting Enhanced Photoelectrochemical Performance

Huichao He,<sup>a, b</sup> Sean P. Berglund,<sup>a</sup> Peng Xiao,<sup>b, c</sup> William D. Chemelewski,<sup>a</sup> Yunhuai Zhang,<sup>\*b</sup> and  
C. Buddie Mullins<sup>\*a</sup>

<sup>a</sup> McKetta Department of Chemical Engineering and Department of Chemistry and Biochemistry, University of Texas at Austin,  
1 University Station C0400, Austin, Texas 78712-0231, United States Fax: (512) 471-7060; Tel: (512) 471-5817; E-mail:  
mullins@che.utexas.edu

<sup>b</sup> College of Chemistry and Chemical Engineering, Chongqing University, Chongqing 400030, China.

<sup>c</sup> College of Physics, Chongqing University, Chongqing 400030, China.

\* To whom correspondence should be addressed: [mullins@che.utexas.edu](mailto:mullins@che.utexas.edu) and [xp2031@163.com](mailto:xp2031@163.com)

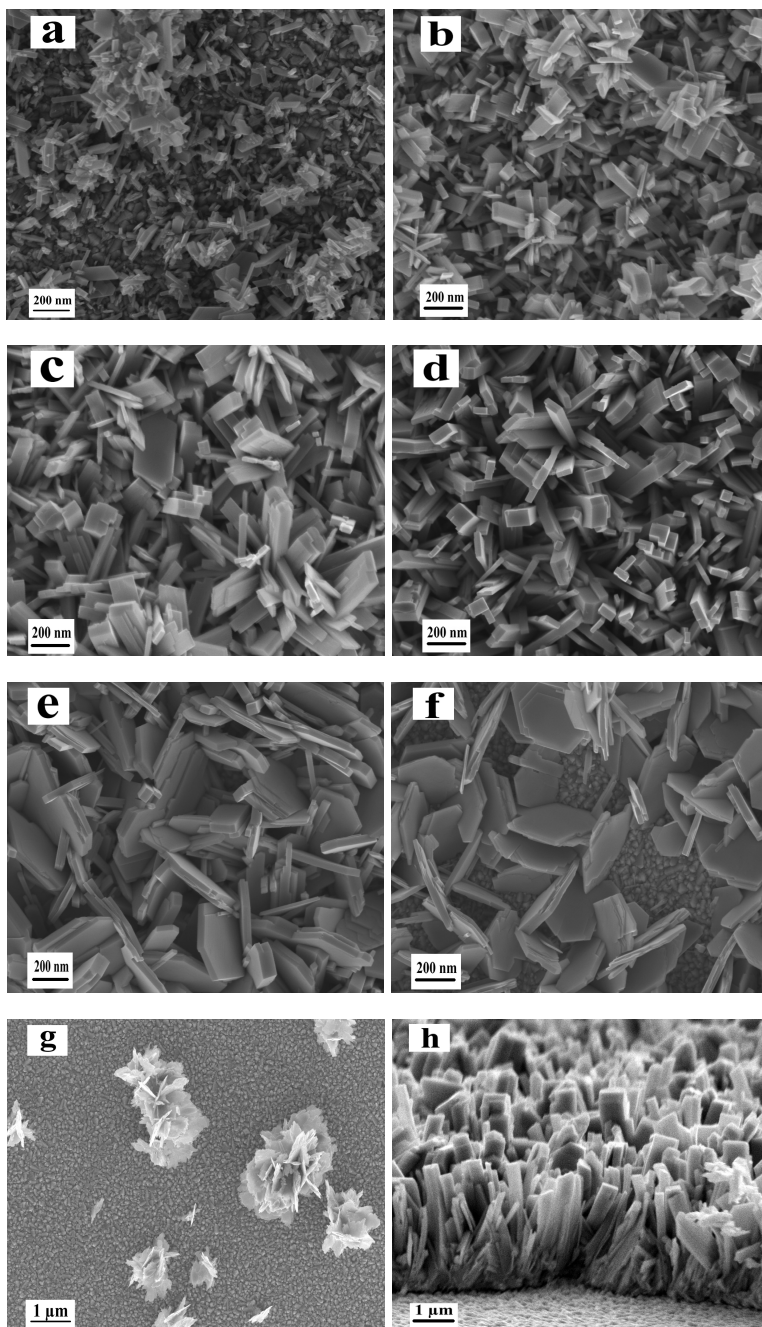

**Fig.S1** Top-view SEM images of nanostructure  $\text{WO}_3 \cdot 0.33\text{H}_2\text{O}$  film synthesized at a  $V_{\text{water}}:V_{\text{ethanol}}$  of (a) 6:0, (b) 5:1, (c) 4:2, (d) 3:3, (e) 2:4, (f) 1:5 and (g) 0:6. (h) Cross-view SEM image of  $\text{WO}_3 \cdot 0.33\text{H}_2\text{O}$  nanoprism arrays on FTO-glass substrate synthesized at a  $V_{\text{water}}:V_{\text{ethanol}}$  of 3:3.

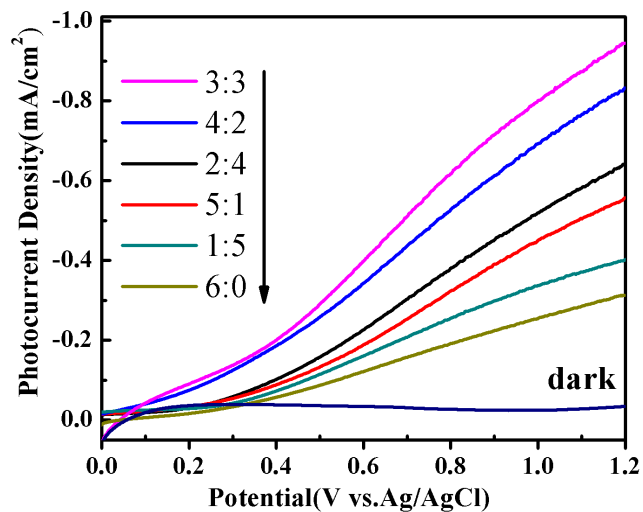

**Fig.S2** LSV scans for the as synthesized WO<sub>3</sub> films in 0.1M Na<sub>2</sub>SO<sub>4</sub> under backside illumination (100 mW/cm<sup>2</sup>) employing different ratios of water and ethanol volume for film growth (as indicated in the figure) and without illumination (dark). The scan rate was 50mV/s. Equal volumes of water and ethanol proved best.

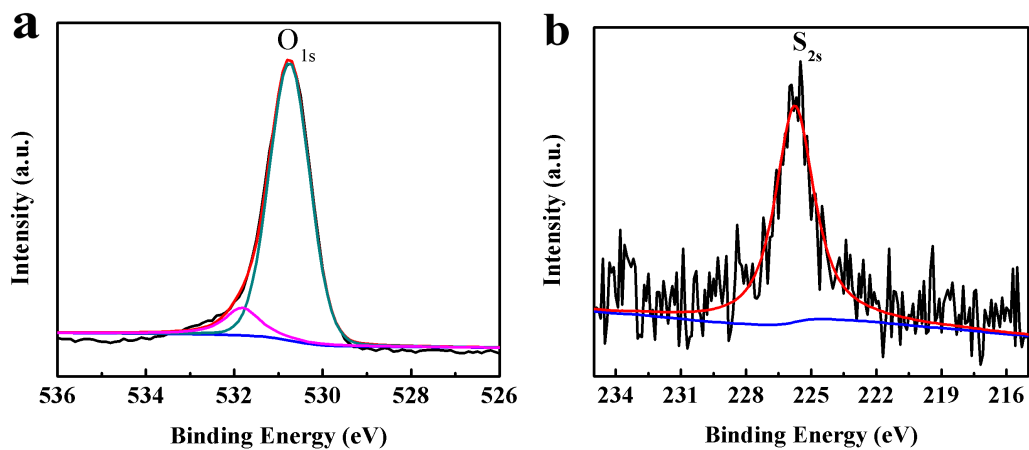

**Fig.S3** High resolution XPS spectrum of (a) O<sub>1s</sub> and (b) S<sub>2s</sub> for Bi<sub>2</sub>S<sub>3</sub>/WO<sub>3</sub> heterojunction film.

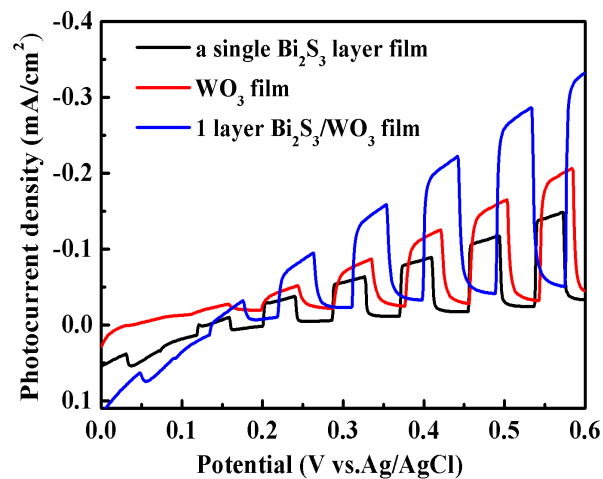

**Fig.S4** Chopped LSV scans for single layer Bi<sub>2</sub>S<sub>3</sub> film, WO<sub>3</sub> film and 1 layer Bi<sub>2</sub>S<sub>3</sub>/WO<sub>3</sub> heterojunction film in a non-aqueous solution containing the iodide/triiodide redox couple under illumination with 100 mW/cm<sup>2</sup> white light. The solution was prepared by dissolving 10 mM I<sub>2</sub> and 50 mM NaI in ethanol. The scan rate was 50mV/s.

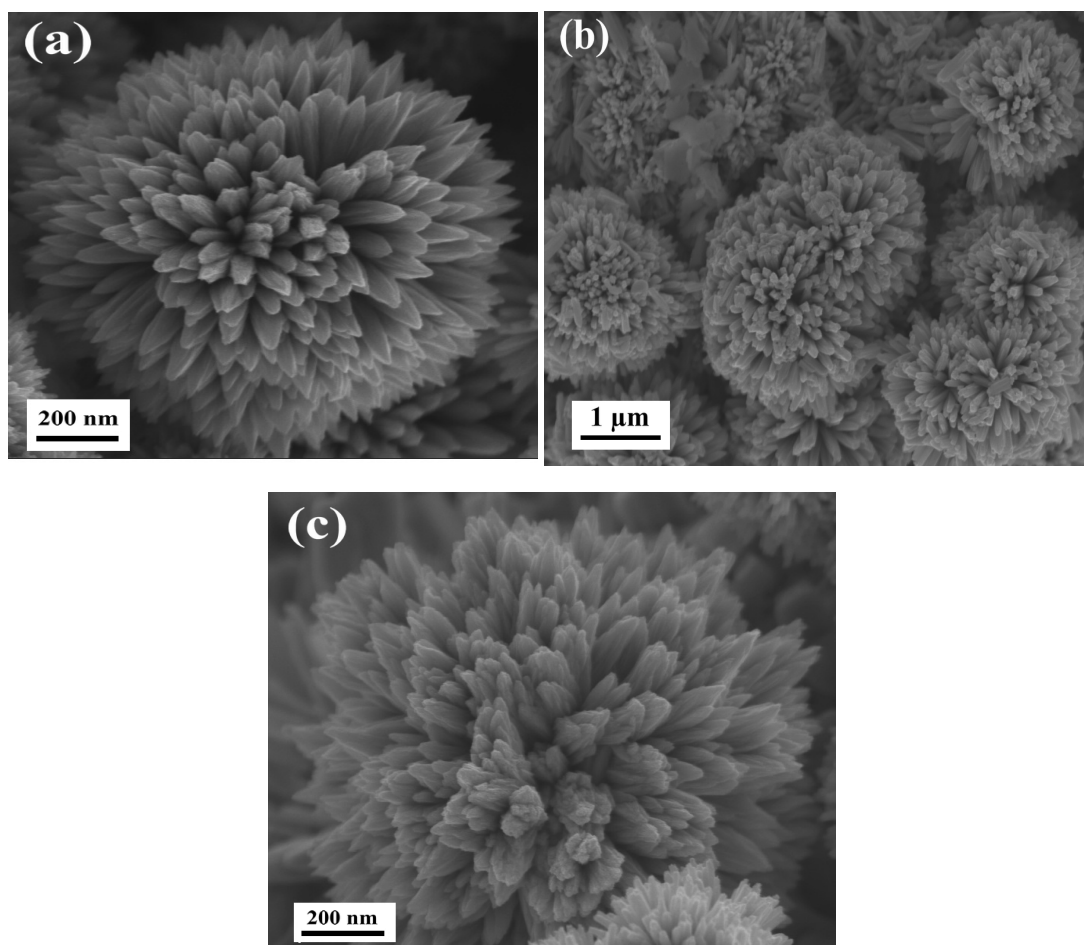

**Fig.S5** SEM images of an urchin-like  $\text{Bi}_2\text{S}_3$  sphere before (a) and after (b and c) the amperometric *i-t* measurement that was conducted in 0.1 M  $\text{Na}_2\text{SO}_4$  at a constant applied potential of 1.0 V vs. Ag/AgCl under 3600 seconds illumination with  $100 \text{ mW/cm}^2$  white light.

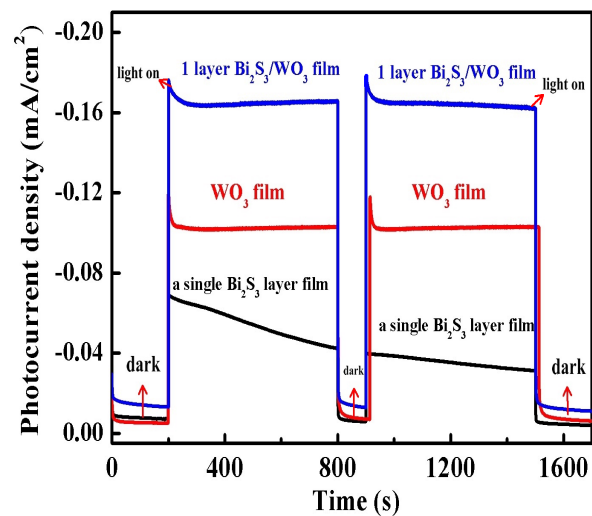

**Fig.S6** Amperometric *i-t* curve for single layer Bi<sub>2</sub>S<sub>3</sub> film, WO<sub>3</sub> film and 1 layer Bi<sub>2</sub>S<sub>3</sub>/WO<sub>3</sub> heterojunction film in a non-aqueous solution containing the iodide/triiodide redox couple at a constant applied potential of 0.4 V vs. Ag/AgCl.

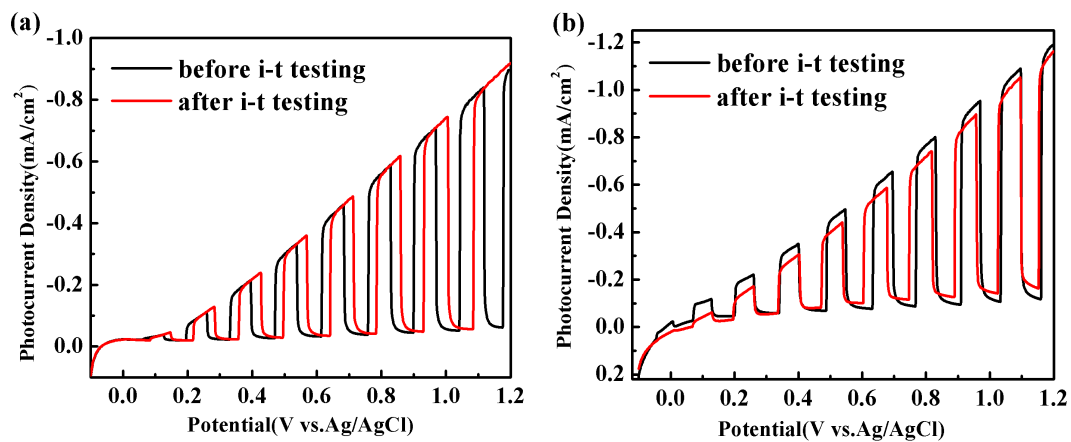

**Fig.S7** Chopped LSV scans for (a) a WO<sub>3</sub> film and (b) a one layer Bi<sub>2</sub>S<sub>3</sub>/WO<sub>3</sub> heterojunction film before and after the amperometric i-t measurements that were conducted in 0.2 M NaCl mixed water-ethanol solution at a constant applied potential of 1.0 V vs. Ag/AgCl under illumination with 100 mW/cm<sup>2</sup> white light. The scan rate was 50mV/s.



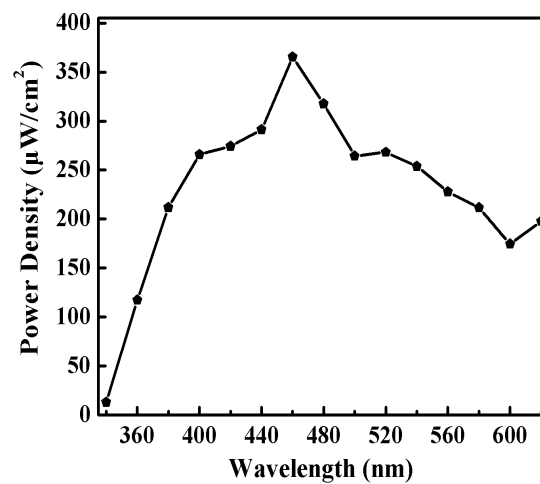

**Fig.S8** A typical incident light power density spectrum (from 340 - 620 nm) used for the IPCE measurements.

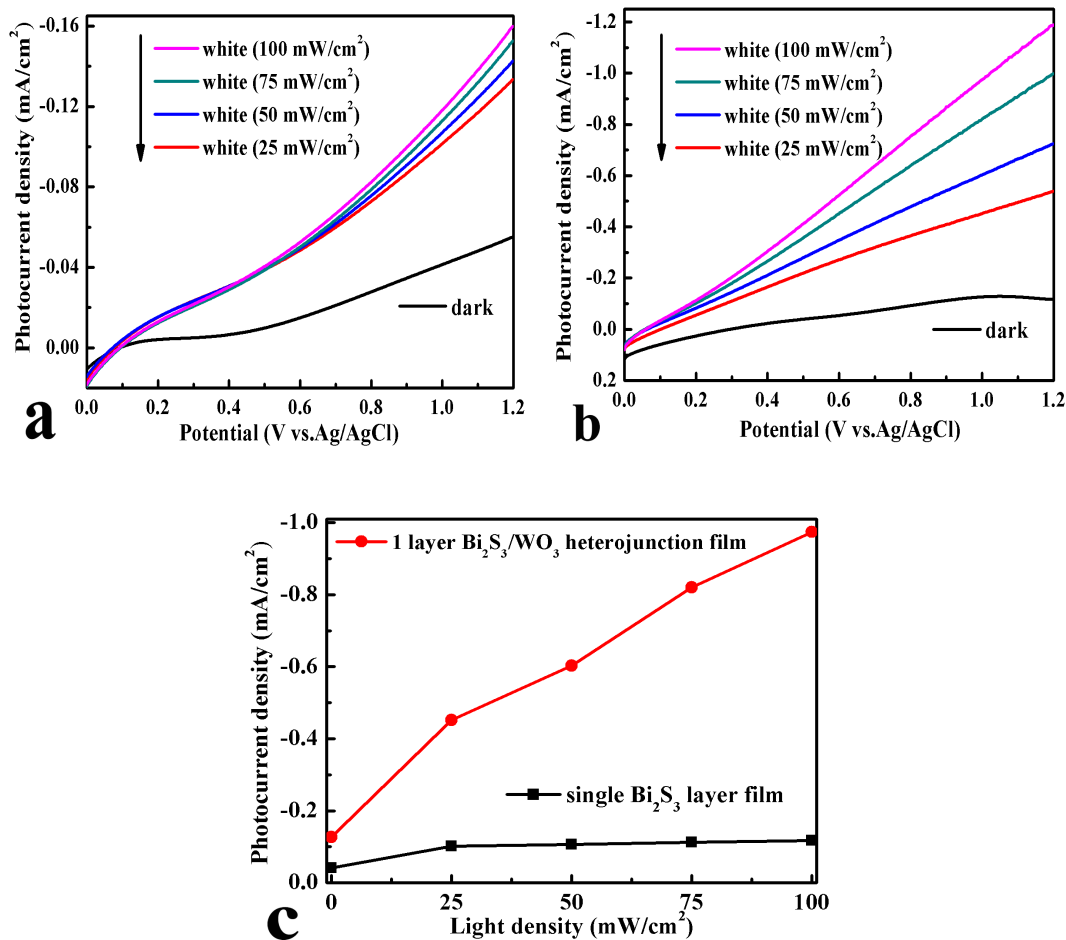

**Fig.S9** LSV scans for (a) single Bi<sub>2</sub>S<sub>3</sub> layer film and (b) 1 layer Bi<sub>2</sub>S<sub>3</sub>/WO<sub>3</sub> heterojunction film in 0.2 M NaCl mixed water-ethanol solution without irradiation (dark) and under illumination with different white light intensities. The scan rate was 50mV/s. (c) The photocurrent of single Bi<sub>2</sub>S<sub>3</sub> layer film and 1 layer Bi<sub>2</sub>S<sub>3</sub>/WO<sub>3</sub> heterojunction film in 0.2 M NaCl mixed water-ethanol solution under illumination with different white light intensities at a constant applied potential of 1.0 V vs. Ag/AgCl.

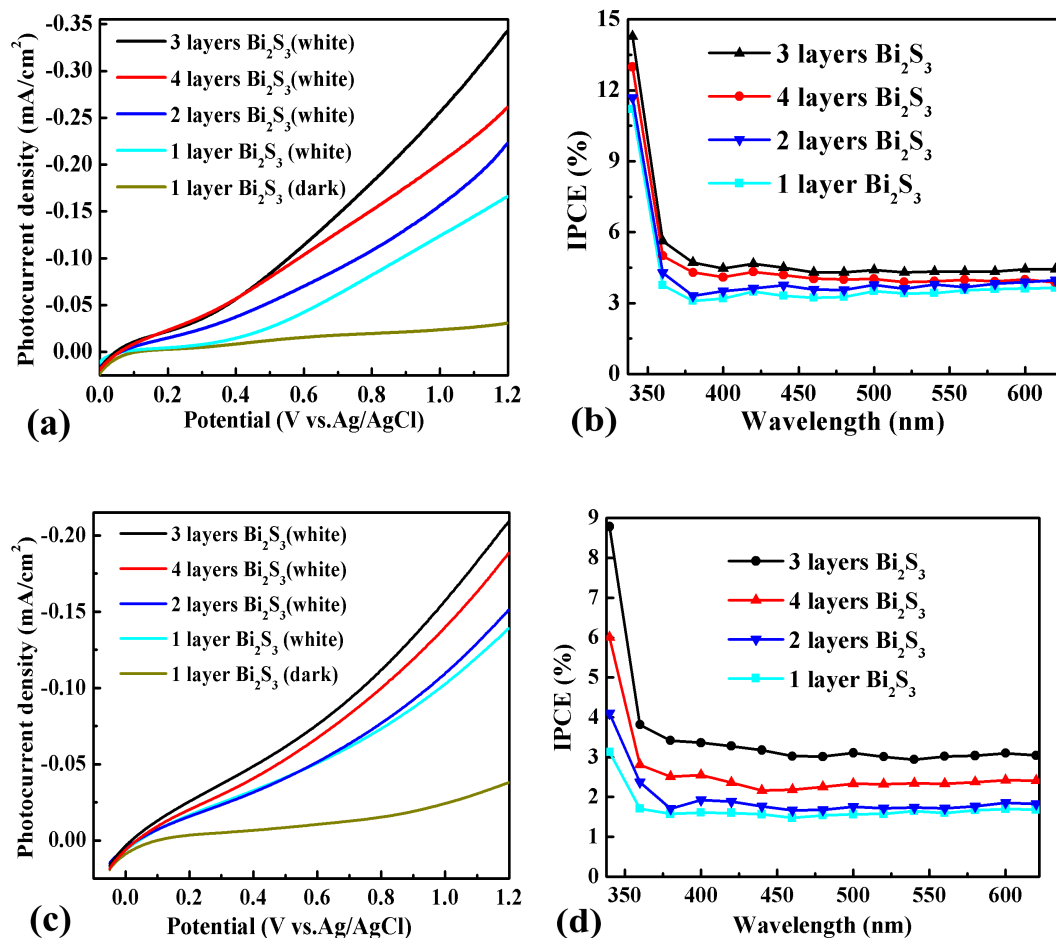

**Fig.S10** LSV scans for Bi<sub>2</sub>S<sub>3</sub> (only) films synthesized with different numbers of Bi<sub>2</sub>S<sub>3</sub> layers on FTO glass substrate in (a) 0.1M Na<sub>2</sub>SO<sub>4</sub> and (c) 0.2 M NaCl mixed water-ethanol solution under illumination with white light. The scan rate was 50 mV/s. IPCE spectra for Bi<sub>2</sub>S<sub>3</sub> films synthesized with different numbers of Bi<sub>2</sub>S<sub>3</sub> layers coated on FTO glass substrate in (b) 0.1M Na<sub>2</sub>SO<sub>4</sub> and (d) 0.2 M NaCl mixed water-ethanol solution at a constant applied potential of 1.0 V vs. Ag/AgCl.
